# Supplementary material for: Randomised Double-Blind Placebo-Controlled Trial of Inulin with Metronidazole in Non-Alcoholic Fatty Liver Disease (NAFLD)
Source: PubMed Central journal article supplement (PMC7230525; doi:10.3390/nu12040937), 2020-03-27
Supplement: nutrients-12-00937-s001.pdf [file nutrients-12-00937-s001.pdf]

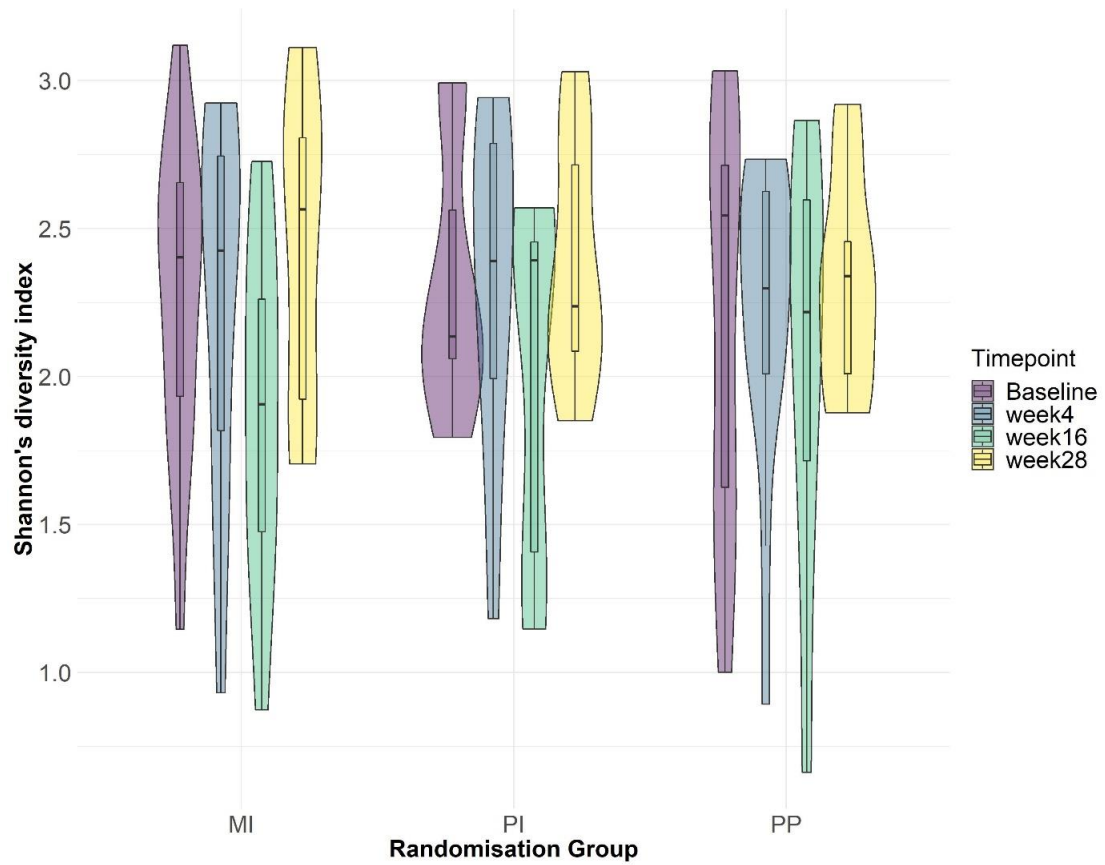

**Figure S1.** Violin plot on the Shannon's diversity index for each group on each time point. MI: metronidazole-inulin (Baseline, n=16; week4, n=11; week16, n=10; week28, n=8); PI: Placebo-inulin (Baseline, n=8; week4, n=12; week16, n=10; week28, n=10); PP: Placebo-placebo (Baseline, n=11; week4, n=15; week16, n=8; week28, n=8).

**Table S1.** DNA quality and quantity measured using a NanoPhotometer N60.

| SubjectID | Treatment groups | Sample collection timeline |         |                                |         |                                        |         |                           |         |
|-----------|------------------|----------------------------|---------|--------------------------------|---------|----------------------------------------|---------|---------------------------|---------|
|           |                  | Baseline (pre VLCD)        |         | Week 4 (after 4 weeks of VLCD) |         | Week 16 (12 weeks after randomisation) |         | Week 28 (follow-up visit) |         |
|           |                  | DNA concentration (ng/uL)  | 260/280 | DNA concentration              | 260/280 | DNA concentration                      | 260/280 | DNA concentration         | 260/280 |
| 1         | MI               | 42.400                     | 1.941   | 22.300                         | 1.806   | -                                      | -       | -                         | -       |
| 2         | MI               | 26.750                     | 2.019   | -                              | -       | 45.600                                 | 2.141   | -                         | -       |
| 3         | PI               | -                          | -       | -                              | -       | -                                      | -       | 40.400                    | 1.985   |
| 4         | PI               | -                          | -       | 70.350                         | 2.054   | -                                      | -       | -                         | -       |
| 5         | PI               | -                          | -       | -                              | -       | -                                      | -       | 119.750                   | 1.970   |
| 7         | PP               | -                          | -       | -                              | -       | 41.200                                 | 2.135   | 76.550                    | 2.097   |
| 8         | PI               | -                          | -       | -                              | -       | -                                      | -       | 82.900                    | 2.022   |
| 9         | PP               | 32.050                     | 2.041   | 56.150                         | 1.974   | -                                      | -       | 27.050                    | 2.073   |
| 10        | PP               | 12.800                     | 1.910   | 11.450                         | 1.893   | 37.500                                 | 1.963   | 28.500                    | 1.875   |
| 11        | MI               | 63.750                     | 2.157   | 35.500                         | 2.101   | -                                      | -       | -                         | -       |
| 12        | PP               | 20.200                     | 1.780   | 34.450                         | 1.852   | -                                      | -       | -                         | -       |
| 13        | MI               | 17.300                     | 1.922   | 15.150                         | 1.751   | 58.000                                 | 1.892   | 29.450                    | 1.925   |
| 14        | PI               | 45.400                     | 1.924   | 25.200                         | 1.806   | 46.800                                 | 1.906   | -                         | -       |
| 15        | PI               | 70.700                     | 2.035   | 48.500                         | 2.042   | 51.250                                 | 2.030   | 87.500                    | 2.137   |
| 16        | MI               | 45.400                     | 1.944   | 24.750                         | 2.124   | 58.300                                 | 1.908   | 30.900                    | 1.974   |
| 18        | PP               | 17.900                     | 2.023   | 23.300                         | 1.910   | 7.950                                  | 1.988   | 12.600                    | 1.938   |
| 19        | PP               | -                          | -       | 57.050                         | 1.991   | -                                      | -       | -                         | -       |
| 20        | PI               | -                          | -       | -                              | -       | 17.750                                 | 1.919   | -                         | -       |
| 22        | PP               | -                          | -       | 38.250                         | 1.848   | -                                      | -       | -                         | -       |
| 23        | MI               | 21.950                     | 1.807   | 12.800                         | 1.631   | 31.050                                 | 1.832   | -                         | -       |
| 24        | PP               | 35.000                     | 2.128   | 27.500                         | 2.060   | 73.900                                 | 2.209   | 16.450                    | 1.982   |
| 26        | PI               | -                          | -       | 40.350                         | 1.877   | 28.600                                 | 2.007   | -                         | -       |
| 28        | PI               | -                          | -       | 40.050                         | 2.147   | -                                      | -       | -                         | -       |

|    |    |        |       |        |       |        |       |        |       |
|----|----|--------|-------|--------|-------|--------|-------|--------|-------|
| 29 | PP | -      | -     | 26.100 | 1.752 | 57.700 | 2.028 | -      | -     |
| 30 | PI | 33.400 | 1.931 | 52.500 | 2.043 | 33.250 | 1.950 | 23.200 | 1.834 |
| 31 | PI | -      | -     | -      | -     | 18.000 | 1.846 | -      | -     |
| 32 | PP | 12.250 | 2.042 | 29.850 | 1.913 | 39.750 | 1.771 | -      | -     |
| 33 | MI | 21.500 | 2.048 | -      | -     | 19.400 | 2.042 | -      | -     |
| 34 | PP | 58.150 | 2.158 | 56.750 | 2.034 | 69.800 | 1.986 | 52.350 | 2.021 |
| 35 | PI | 42.250 | 2.066 | 58.750 | 2.140 | -      | -     | -      | -     |
| 36 | MI | 16.750 | 2.055 | 63.250 | 1.802 | 20.750 | 2.173 | -      | -     |
| 37 | MI | 5.95   | 1.859 | -      | -     | -      | -     | 4.2500 | 2.125 |
| 38 | PP | 22.150 | 1.779 | 10.900 | 1.817 | -      | -     | -      | -     |
| 39 | PI | -      | -     | -      | -     | -      | -     | 8.050  | 2.403 |
| 40 | PI | 17.350 | 2.129 | 25.450 | 1.943 | 11.250 | 1.940 | 12.500 | 1.880 |
| 41 | PI | -      | -     | -      | -     | 4.800  | 1.600 | -      | -     |
| 42 | PI | 26.550 | 2.019 | 16.150 | 1.900 | 14.750 | 1.967 | -      | -     |
| 43 | MI | 12.400 | 2.016 | 27.950 | 1.908 | 31.550 | 1.966 | 16.950 | 1.982 |
| 44 | PP | 14.600 | 1.921 | 38.300 | 1.819 | -      | -     | -      | -     |
| 45 | PP | 39.700 | 2.129 | 48.100 | 2.167 | -      | -     | -      | -     |
| 46 | MI | 47.600 | 2.079 | -      | -     | 25.500 | 1.939 | 11.100 | 1.748 |
| 47 | MI | 51.000 | 2.094 | 4.0500 | 1.761 | -      | -     | -      | -     |
| 48 | PP | 12.200 | 2.122 | 12.400 | 1.865 | 18.950 | 2.191 | 43.650 | 2.030 |
| 49 | MI | 46.850 | 1.964 | 8.9000 | 1.854 | -      | -     | 23.800 | 2.125 |
| 50 | PI | 16.300 | 1.906 | 14.150 | 1.655 | -      | -     | 59.550 | 1.988 |
| 53 | PI | 54.450 | 2.110 | 25.550 | 1.886 | -      | -     | 29.900 | 1.980 |
| 54 | MI | 7.300  | 2.317 | 5.100  | 1.962 | 31.200 | 1.914 | 5.000  | 1.563 |
| 55 | MI | 18.100 | 2.129 | 7.8500 | 1.805 | -      | -     | 37.900 | 1.964 |
| 56 | MI | 65.000 | 1.937 | -      | -     | 32.550 | 1.955 | 43.750 | 1.971 |
| 58 | PP | 41.900 | 2.095 | 51.800 | 2.072 | -      | -     | -      | -     |
| 59 | PP | -      | -     | -      | -     | 59.350 | 1.982 | 59.750 | 1.924 |
| 60 | PI | -      | -     | 27.000 | 2.015 | 53.500 | 2.054 | 23.750 | 2.039 |

**Table S2.** Linear modeling results showing genera associated with the VLCD treatment.

| <b>Feature</b>                                                                                                     | <b>Value</b> | <b>Coefficient</b> | <b>N</b> | <b>N.not.0</b> | <b>P.value</b> | <b>Q.value</b> |
|--------------------------------------------------------------------------------------------------------------------|--------------|--------------------|----------|----------------|----------------|----------------|
| k__Bacteria_p__Firmicutes_c__Clostridia_o__Clostridiales_f__Lachnospiraceae_g__Roseburia                           | week4        | -0.11757           | 73       | 67             | 2.37E-06       | 0.000505       |
| k__Bacteria_p__Firmicutes_c__Bacilli_o__Lactobacillales_f__Streptococcaceae_g__Streptococcus                       | week4        | -0.02018           | 73       | 56             | 4.76E-06       | 0.000507       |
| k__Bacteria_p__Firmicutes_c__Clostridia_o__Clostridiales_f__Veillonellaceae_g__Dialister                           | week4        | -0.05847           | 73       | 40             | 0.000457       | 0.032459       |
| k__Bacteria_p__Firmicutes_c__Clostridia_o__Clostridiales_f__Christensenellaceae_g__                                | week4        | 0.01761            | 73       | 41             | 0.004863       | 0.226181       |
| k__Bacteria_p__Firmicutes_c__Clostridia_o__Clostridiales_f__Lachnospiraceae__                                      | week4        | 0.01911            | 73       | 64             | 0.005309       | 0.226181       |
| k__Bacteria_p__Firmicutes_c__Clostridia_o__Clostridiales_f__Dehalobacteriaceae_g__Dehalobacterium                  | week4        | 0.006089           | 73       | 26             | 0.010986       | 0.353771       |
| k__Bacteria_p__Bacteroidetes_c__Bacteroidia_o__Bacteroidales_f__Bacteroidaceae_g__Bacteroides                      | week4        | 0.13123            | 73       | 73             | 0.017087       | 0.363955       |
| k__Bacteria_p__Firmicutes_c__Clostridia_o__Clostridiales_f__Ruminococcaceae_g__Anaerotruncus                       | week4        | 0.006331           | 73       | 44             | 0.021915       | 0.394094       |
| k__Bacteria_p__Actinobacteria_c__Coriobacteriia_o__Coriobacteriales_f__Coriobacteriaceae_g__Collinsella            | week4        | -0.02022           | 73       | 68             | 0.031263       | 0.512226       |
| k__Bacteria_p__Proteobacteria_c__Deltaproteobacteria_o__Desulfovibrionales_f__Desulfovibrionaceae_g__Desulfovibrio | week4        | 0.014862           | 73       | 27             | 0.035998       | 0.547683       |
| k__Bacteria_p__Firmicutes_c__Clostridia_o__Clostridiales_f__Ruminococcaceae_g__Gemmiger                            | week4        | -0.02177           | 73       | 65             | 0.043413       | 0.601146       |
| k__Bacteria_p__Firmicutes_c__Clostridia_o__Clostridiales_f__Veillonellaceae_g__Veillonella                         | week4        | -0.00925           | 73       | 40             | 0.045156       | 0.601146       |
| k__Bacteria_p__Bacteroidetes_c__Bacteroidia_o__Bacteroidales_f__Odoribacteraceae_g__Odoribacter                    | week4        | 0.014542           | 73       | 51             | 0.06343        | 0.711088       |
| k__Bacteria_p__Proteobacteria_c__Gammaproteobacteria_o__Enterobacteriales_f__Enterobacteriaceae_g__Enterobacter    | week4        | 0.003923           | 73       | 28             | 0.085399       | 0.826816       |

---

|                                                                                                           |       |          |    |    |          |   |
|-----------------------------------------------------------------------------------------------------------|-------|----------|----|----|----------|---|
| k__Bacteria_p__Bacteroidetes_c__Bacteroidia_o__Bacteroidales_f__Porphyromonadaceae_g__Parabacteroides     | week4 | 0.023817 | 73 | 70 | 0.149417 | 1 |
| k__Bacteria_p__Firmicutes_c__Clostridia_o__Clostridiales_f__Lachnospiraceae_g__Blautia                    | week4 | 0.015649 | 73 | 71 | 0.173858 | 1 |
| k__Bacteria_p__Firmicutes_c__Clostridia_o__Clostridiales_f__Lachnospiraceae_g__Ruminococcus_              | week4 | 0.011154 | 73 | 65 | 0.313664 | 1 |
| k__Bacteria_p__Bacteroidetes_c__Bacteroidia_o__Bacteroidales_f__Barnesiellaceae_                          | week4 | -0.00508 | 73 | 16 | 0.319608 | 1 |
| k__Bacteria_p__Firmicutes_c__Erysipelotrichi_o__Erysipelotrichales_f__Erysipelotrichaceae_g__Eubacterium_ | week4 | 0.004704 | 73 | 52 | 0.395803 | 1 |

---

**Table S3.** Linear modeling results showing genera associated with the antibiotic/prebiotic treatment period.

| Feature                                                                                                      | Value | Coefficient | N  | N.not.<br>0 | P.value  | Q.value  |
|--------------------------------------------------------------------------------------------------------------|-------|-------------|----|-------------|----------|----------|
| k_Bacteria_p_Firmicutes_c_Clostridia_o_Clostridiales_f_Lachnospiraceae_g_Roseburia                           | week4 | -0.078173   | 66 | 59          | 0.000166 | 0.026219 |
| k_Bacteria_p_Firmicutes_c_Clostridia_o_Clostridiales_f_Ruminococcaceae_g_An_aerostruncus                     | week4 | 0.0098941   | 66 | 41          | 0.000356 | 0.026219 |
| k_Bacteria_p_Firmicutes_c_Clostridia_o_Clostridiales_f_Lachnospiraceae__                                     | week4 | 0.0304695   | 66 | 59          | 0.000386 | 0.026219 |
| k_Bacteria_p_Firmicutes_c_Clostridia_o_Clostridiales_f_Lachnospiraceae_g_Blautia                             | week4 | 0.0378814   | 66 | 62          | 0.005721 | 0.211808 |
| k_Bacteria_p_Proteobacteria_c_Deltaproteobacteria_o_Desulfovibrionales_f_Desulfovibrionaceae_g_Desulfovibrio | week4 | 0.0290155   | 66 | 21          | 0.006056 | 0.211808 |
| k_Bacteria_p_Firmicutes_c_Clostridia_o_Clostridiales_f_Ruminococcaceae__                                     | week4 | 0.0306268   | 66 | 61          | 0.00623  | 0.211808 |
| k_Bacteria_p_Firmicutes_c_Clostridia_o_Clostridiales_f_Lachnospiraceae_g_Dorea                               | week4 | 0.023113    | 66 | 65          | 0.012616 | 0.321714 |
| k_Bacteria_p_Firmicutes_c_Clostridia_o_Clostridiales_f_Ruminococcaceae_g_Oscillospira                        | week4 | 0.0534824   | 66 | 64          | 0.020661 | 0.421491 |
| k_Bacteria_p_Firmicutes_c_Clostridia_o_Clostridiales_f_Lachnospiraceae_g_Ruminococcus_                       | week4 | 0.0226583   | 66 | 56          | 0.023205 | 0.430353 |
| k_Bacteria_p_Firmicutes_c_Clostridia_o_Clostridiales_f_Christensenellaceae_g_                                | week4 | 0.0175659   | 66 | 39          | 0.033743 | 0.488615 |
| k_Bacteria_p_Firmicutes_c_Clostridia_o_Clostridiales_f_Dehalobacteriaceae_g_Dehalobacterium                  | week4 | 0.0063093   | 66 | 23          | 0.036038 | 0.488615 |
| k_Bacteria_p_Firmicutes_c_Clostridia_o_Clostridiales_f_Ruminococcaceae_g_Ruminococcus                        | week4 | 0.030421    | 66 | 64          | 0.038323 | 0.488615 |
| k_Bacteria_p_Proteobacteria_c_Gammaproteobacteria_o_Enterobacteriales_f_Enterobacteriaceae_g_Enterobacter    | week4 | 0.0598402   | 66 | 21          | 0.041987 | 0.503844 |
| k_Bacteria_p_Bacteroidetes_c_Bacteroidia_o_Bacteroidales_f_Porphyrimonadaceae_g_Parabacteroides              | week4 | 0.0326368   | 66 | 64          | 0.051884 | 0.588018 |
| k_Bacteria_p_Firmicutes_c_Clostridia_o_Clostridiales_f_Lachnospiraceae_g_                                    | week4 | 0.0282031   | 66 | 65          | 0.072873 | 0.607803 |
| k_Bacteria_p_Bacteroidetes_c_Bacteroidia_o_Bacteroidales_f__Odoribacteraceae_g__Odoribacter                  | week4 | 0.0174361   | 66 | 46          | 0.086403 | 0.607803 |

|                                                                                                         |       |            |    |    |          |          |
|---------------------------------------------------------------------------------------------------------|-------|------------|----|----|----------|----------|
| k_Bacteria_p_Firmicutes_c_Clostridia_o_Clostridiales_f_g                                                | week4 | 0.025575   | 66 | 59 | 0.163102 | 0.811533 |
| k_Bacteria_p_Actinobacteria_c_Actinobacteria_o_Bifidobacteriales_f_Bifidobacteriaceae_g_Bifidobacterium | week4 | -0.0145479 | 66 | 50 | 0.190028 | 0.88104  |
| k_Bacteria_p_Firmicutes_c_Erysipelotrichi_o_Erysipelotrichales_f_Erysipelotrichaceae_g_Eubacterium      | week4 | 0.0080958  | 66 | 47 | 0.202493 | 0.91797  |
| k_Bacteria_p_Firmicutes_c_Erysipelotrichi_o_Erysipelotrichales_f_Erysipelotrichaceae_g_Clostridium      | week4 | 0.002867   | 66 | 28 | 0.293843 | 0.952471 |
| k_Bacteria_p_Bacteroidetes_c_Bacteroidia_o_Bacteroidales_f_Rikenellaceae_g_Alistipes                    | week4 | 0.0069049  | 66 | 54 | 0.377679 | 1        |
| k_Bacteria_p_Bacteroidetes_c_Bacteroidia_o_Bacteroidales_f_Prevotellaceae_g_Prevotella                  | week4 | -0.0184709 | 66 | 34 | 0.443291 | 1        |
| k_Bacteria_p_Proteobacteria_c_Deltaproteobacteria_o_Desulfovibrionales_f_Desulfovibrionaceae_g          | week4 | 0.0022412  | 66 | 26 | 0.444285 | 1        |
| k_Bacteria_p_Firmicutes_c_Erysipelotrichi_o_Erysipelotrichales_f_Erysipelotrichaceae_g_Coprobacillus    | week4 | -0.0011672 | 66 | 16 | 0.769155 | 1        |
| k_Bacteria_p_Bacteroidetes_c_Bacteroidia_o_Bacteroidales_f_Bacteroidaceae_g_Bacteroides                 | week4 | 0.0095178  | 66 | 65 | 0.840294 | 1        |

**Table S4.** Linear modeling results showing suggestive association between genus *Turicibacter* and plasma ALT levels.

| Feature                                                                                                        | Value | Coefficient | N  | N.not.<br>0 | P.value  | Q.value  |
|----------------------------------------------------------------------------------------------------------------|-------|-------------|----|-------------|----------|----------|
| k__Bacteria_p__Firmicutes_c__Bacilli_o__Turicibacterales_f__Turicibacteraceae_g__Turicibacter                  | ALT   | 0.000315    | 82 | 21          | 0.00066  | 0.085764 |
| k__Bacteria_p__Firmicutes_c__Clostridia_o__Clostridiales_f__Lachnospiraceae_g__                                | ALT   | 0.000899    | 82 | 82          | 0.002311 | 0.150211 |
| k__Bacteria_p__Firmicutes_c__Clostridia_o__Clostridiales_f__Veillonellaceae_g__Veillonella                     | ALT   | 0.000265    | 82 | 47          | 0.046431 | 0.660741 |
| k__Bacteria_p__Firmicutes_c__Clostridia_o__Clostridiales_g__                                                   | ALT   | 0.000283    | 82 | 77          | 0.049201 | 0.660741 |
| k__Bacteria_p__Bacteroidetes_c__Bacteroidia_o__Bacteroidales_f__Bacteroidaceae_g__Bacteroides                  | ALT   | -0.00266    | 82 | 82          | 0.061736 | 0.666999 |
| k__Bacteria_p__Firmicutes_c__Clostridia_o__Clostridiales_f__Lachnospiraceae_g__Lachnospira                     | ALT   | 0.000496    | 82 | 70          | 0.071831 | 0.666999 |
| k__Bacteria_p__Firmicutes_c__Bacilli_o__Lactobacillales_f__Streptococcaceae_g__Streptococcus                   | ALT   | 0.00019     | 82 | 64          | 0.09056  | 0.735799 |
| k__Bacteria_p__Firmicutes_c__Clostridia_o__Clostridiales_f__Lachnospiraceae_g__Coprococcus                     | ALT   | 0.000425    | 82 | 78          | 0.130709 | 0.917352 |
| k__Bacteria_p__Firmicutes_c__Clostridia_o__Clostridiales_f__Lachnospiraceae_g__Roseburia                       | ALT   | 0.000679    | 82 | 80          | 0.149861 | 0.917352 |
| k__Bacteria_p__Verrucomicrobia_c__Verrucomicrobiae_o__Verrucomicrobiales_f__Verrucomicrobiaceae_g__Akkermansia | ALT   | -0.00068    | 82 | 43          | 0.151329 | 0.917352 |
| k__Bacteria_p__Actinobacteria_c__Coriobacteriia_o__Coriobacteriales_f__Coriobacteriaceae_g__Slackia            | ALT   | 7.91E-05    | 82 | 30          | 0.183142 | 0.923009 |
| k__Bacteria_p__Bacteroidetes_c__Bacteroidia_o__Bacteroidales_f__Barnesiellaceae_g__Barnesiella                 | ALT   | 0.000186    | 82 | 28          | 0.214274 | 0.923009 |
| k__Bacteria_p__Firmicutes_c__Bacilli_o__Lactobacillales_f__Lactobacillaceae_g__Lactobacillus                   | ALT   | 0.000246    | 82 | 28          | 0.261751 | 0.923009 |
| k__Bacteria_p__Firmicutes_c__Clostridia_o__Clostridiales_f__Lachnospiraceae_g__                                | ALT   | -0.00015    | 82 | 75          | 0.267555 | 0.923009 |



|                                                                                                                |     |           |    |    |          |          |
|----------------------------------------------------------------------------------------------------------------|-----|-----------|----|----|----------|----------|
| k_Bacteria_p_Bacteroidetes_c_Bacteroidia_o_Bacteroidales_f__Odoribacteraceae_g__Odoribacter                    | ALT | 0.000256  | 82 | 62 | 0.268442 | 0.923009 |
| k_Bacteria_p_Bacteroidetes_c_Bacteroidia_o_Bacteroidales_f__Paraprevotellaceae_g__Paraprevotella               | ALT | 0.000216  | 82 | 26 | 0.281156 | 0.923009 |
| k_Bacteria_p_Bacteroidetes_c_Bacteroidia_o_Bacteroidales_f__Porphyromonadaceae_g__Parabacteroides              | ALT | -0.00039  | 82 | 81 | 0.289145 | 0.923009 |
| k_Bacteria_p_Firmicutes_c_Clostridia_o_Clostridiales_f__Lachnospiraceae_g__Ruminococcus                        | ALT | -0.00013  | 82 | 28 | 0.289975 | 0.923009 |
| k_Bacteria_p_Firmicutes_c_Erysipelotrichi_o_Erysipelotrichales_f__Erysipelotrichaceae_g__                      | ALT | 0.000201  | 82 | 62 | 0.29611  | 0.923009 |
| k_Bacteria_p_Firmicutes_c_Clostridia_o_Clostridiales_f__Lachnospiraceae_g__Ruminococcus__                      | ALT | 0.000223  | 82 | 70 | 0.326751 | 0.923009 |
| k_Bacteria_p_Firmicutes_c_Erysipelotrichi_o_Erysipelotrichales_f__Erysipelotrichaceae_g__Clostridium           | ALT | 6.34E-05  | 82 | 31 | 0.350991 | 0.923009 |
| k_Bacteria_p_Firmicutes_c_Clostridia_o_Clostridiales_f__Ruminococcaceae_g__Oscillospira                        | ALT | -0.00047  | 82 | 81 | 0.365377 | 0.923009 |
| k_Bacteria_p_Firmicutes_c_Clostridia_o_Clostridiales_f__g__                                                    | ALT | -0.00019  | 82 | 73 | 0.397243 | 0.923009 |
| k_Bacteria_p_Firmicutes_c_Clostridia_o_Clostridiales_f__Clostridiaceae_g__Clostridium                          | ALT | 8.73E-05  | 82 | 38 | 0.398325 | 0.923009 |
| k_Bacteria_p_Firmicutes_c_Clostridia_o_Clostridiales_f__Ruminococcaceae_g__                                    | ALT | -0.0004   | 82 | 77 | 0.408791 | 0.923009 |
| k_Bacteria_p_Firmicutes_c_Clostridia_o_Clostridiales_f__Ruminococcaceae_g__Anaerotruncus                       | ALT | -4.62E-05 | 82 | 43 | 0.410558 | 0.923009 |
| k_Bacteria_p_Firmicutes_c_Clostridia_o_Clostridiales_f__Lachnospiraceae_g__Anaerostipes                        | ALT | 7.46E-05  | 82 | 50 | 0.422095 | 0.923009 |
| k_Bacteria_p_Proteobacteria_c_Deltaproteobacteria_o_Desulfovibrionales_f__Desulfovibrionaceae_g__Desulfovibrio | ALT | -0.00016  | 82 | 35 | 0.432009 | 0.923009 |
| k_Bacteria_p_Proteobacteria_c_Betaproteobacteria_o_Burkholderiales_f__Alcaligenaceae_g__Sutterella             | ALT | 0.000289  | 82 | 76 | 0.438002 | 0.923009 |
| k_Bacteria_p_Actinobacteria_c_Actinobacteria_o_Bifidobacteriales_f__Bifidobacteriaceae_g__Bifidobacterium      | ALT | 0.00021   | 82 | 66 | 0.484871 | 0.923009 |

|                                                                                                                 |     |           |    |    |          |          |
|-----------------------------------------------------------------------------------------------------------------|-----|-----------|----|----|----------|----------|
| k__Bacteria_p__Firmicutes_c__Clostridia_o__Clostridiales_f__Lachnospiraceae_g__Blautia                          | ALT | 0.000167  | 82 | 81 | 0.490913 | 0.923009 |
| k__Bacteria_p__Firmicutes_c__Clostridia_o__Clostridiales_f__Lachnospiraceae_g__Dorea                            | ALT | -0.00015  | 82 | 78 | 0.4915   | 0.923009 |
| k__Bacteria_p__TM7_c__TM7_3_o__f__g__                                                                           | ALT | 1.84E-05  | 82 | 26 | 0.514072 | 0.92981  |
| k__Bacteria_p__Firmicutes_c__Clostridia_o__Clostridiales_f__Ruminococcaceae_e_g__Gemmiger                       | ALT | 0.000177  | 82 | 73 | 0.525466 | 0.92981  |
| k__Bacteria_p__Proteobacteria_c__Gammaproteobacteria_o__Enterobacteriales_f__Enterobacteriaceae__               | ALT | -7.12E-05 | 82 | 37 | 0.555149 | 0.937178 |
| k__Bacteria_p__Firmicutes_c__Clostridia_o__Clostridiales_f__Peptostreptococcaceae__                             | ALT | 3.66E-05  | 82 | 26 | 0.560943 | 0.937178 |
| k__Bacteria_p__Proteobacteria_c__Deltaproteobacteria_o__Desulfovibrionales_f__Desulfovibrionaceae_g__Bilophila  | ALT | -0.00011  | 82 | 57 | 0.567322 | 0.937178 |
| k__Bacteria_p__Actinobacteria_c__Coriobacteriia_o__Coriobacteriales_f__Coriobacteriaceae_g__Eggerthella         | ALT | -2.52E-05 | 82 | 23 | 0.56851  | 0.937178 |
| k__Bacteria_p__Firmicutes_c__Clostridia_o__Clostridiales_f__Veillonellaceae_g__Phascolarctobacterium            | ALT | -0.00021  | 82 | 50 | 0.569516 | 0.937178 |
| k__Bacteria_p__Proteobacteria_c__Deltaproteobacteria_o__Desulfovibrionales_f__Desulfovibrionaceae_g__           | ALT | 3.56E-05  | 82 | 27 | 0.580933 | 0.944016 |
| k__Bacteria_p__Bacteroidetes_c__Bacteroidia_o__Bacteroidales_f__Prevotellaceae_g__Prevotella                    | ALT | 0.000383  | 82 | 48 | 0.657798 | 1        |
| k__Bacteria_p__Firmicutes_c__Clostridia_o__Clostridiales_f__Ruminococcaceae_e_g__Butyricoccus                   | ALT | 5.27E-05  | 82 | 48 | 0.66577  | 1        |
| k__Bacteria_p__Firmicutes_c__Clostridia_o__Clostridiales_f__Lachnospiraceae_g__Clostridium                      | ALT | -7.19E-05 | 82 | 76 | 0.667884 | 1        |
| k__Bacteria_p__Proteobacteria_c__Gammaproteobacteria_o__Enterobacteriales_f__Enterobacteriaceae_g__Enterobacter | ALT | 0.000212  | 82 | 26 | 0.693077 | 1        |
| k__Bacteria_p__Firmicutes_c__Clostridia_o__Clostridiales_f__Ruminococcaceae_e__                                 | ALT | -7.85E-05 | 82 | 76 | 0.711964 | 1        |
| k__Bacteria_p__Firmicutes_c__Erysipelotrichi_o__Erysipelotrichales_f__Erysipelotrichaceae_g__Eubacterium__      | ALT | -5.64E-05 | 82 | 61 | 0.713943 | 1        |

|                                                                                                                |     |           |    |    |          |   |
|----------------------------------------------------------------------------------------------------------------|-----|-----------|----|----|----------|---|
| k__Bacteria_p__Firmicutes_c__Clostridia_o__Clostridiales_f__Mogibacteriaceae_g__                               | ALT | 3.71E-05  | 82 | 65 | 0.749266 | 1 |
| k__Bacteria_p__Bacteroidetes_c__Bacteroidia_o__Bacteroidales_f__Barnesiellaceae_g__                            | ALT | -5.48E-05 | 82 | 33 | 0.756386 | 1 |
| k__Bacteria_p__Proteobacteria_c__Gammaproteobacteria_o__Enterobacteriales_f__Enterobacteriaceae_g__Escherichia | ALT | -8.11E-05 | 82 | 58 | 0.761481 | 1 |
| k__Bacteria_p__Firmicutes_c__Erysipelotrichi_o__Erysipelotrichales_f__Erysipelotrichaceae_g__Holdemania        | ALT | -1.69E-05 | 82 | 42 | 0.777823 | 1 |
| k__Bacteria_p__Bacteroidetes_c__Bacteroidia_o__Bacteroidales_f__Rikenellaceae_g__                              | ALT | 1.95E-05  | 82 | 24 | 0.815435 | 1 |
| k__Bacteria_p__Bacteroidetes_c__Bacteroidia_o__Bacteroidales_f__Rikenellaceae_g__Alistipes                     | ALT | -3.48E-05 | 82 | 69 | 0.829132 | 1 |
| k__Bacteria_p__Bacteroidetes_c__Bacteroidia_o__Bacteroidales_f__Odoribacteraceae_g__Butyricimonas              | ALT | -1.67E-05 | 82 | 21 | 0.850824 | 1 |
| k__Bacteria_p__Firmicutes_c__Clostridia_o__Clostridiales_f__Ruminococcaceae_g__Ruminococcus                    | ALT | -5.78E-05 | 82 | 82 | 0.861137 | 1 |
| k__Bacteria_p__Firmicutes_c__Clostridia_o__Clostridiales_f__Veillonellaceae_g__Acidaminococcus                 | ALT | -3.33E-05 | 82 | 25 | 0.865238 | 1 |
| k__Bacteria_p__Actinobacteria_c__Coriobacteriia_o__Coriobacteriales_f__Coriobacteriaceae_g__                   | ALT | -1.19E-05 | 82 | 62 | 0.916727 | 1 |
| k__Bacteria_p__Firmicutes_c__Clostridia_o__Clostridiales_f__Veillonellaceae_g__Dialister                       | ALT | -5.24E-05 | 82 | 46 | 0.932128 | 1 |
| k__Bacteria_p__Actinobacteria_c__Coriobacteriia_o__Coriobacteriales_f__Coriobacteriaceae_g__Collinsella        | ALT | -2.30E-05 | 82 | 75 | 0.934909 | 1 |
| k__Bacteria_p__Firmicutes_c__Clostridia_o__Clostridiales_f__Ruminococcaceae_g__Faecalibacterium                | ALT | 3.10E-05  | 82 | 76 | 0.935072 | 1 |
| k__Bacteria_p__Firmicutes_c__Clostridia_o__Clostridiales_f__Christensenellaceae_g__                            | ALT | 5.61E-06  | 82 | 43 | 0.963799 | 1 |
| k__Bacteria_p__Firmicutes_c__Clostridia_o__Clostridiales_f__Veillonellaceae_g__Megasphaera                     | ALT | -9.85E-06 | 82 | 27 | 0.983083 | 1 |
| k__Bacteria_p__Firmicutes_c__Erysipelotrichi_o__Erysipelotrichales_f__Erysipelotrichaceae_g__Catenibacterium   | ALT | -2.87E-06 | 82 | 27 | 0.984265 | 1 |

---
